# Supplementary material for: OsATG8c-Mediated Increased Autophagy Regulates the Yield and Nitrogen Use Efficiency in Rice
Source: PubMed Central journal article supplement (PMC6801700; doi:10.3390/ijms20194956), 2019-10-08
Supplement: ijms-20-04956-s001.pdf [file ijms-20-04956-s001.pdf]

## Supplementary Materials

# 1 *OsATG8c*-mediated increased autophagy increases 2 the yield and nitrogen use efficiency (NUE) in rice

3 Xiaoxi Zhen<sup>1</sup> · Xin Li<sup>1</sup> · Jinlei Yu<sup>1</sup> · Fan Xu<sup>1,\*</sup>

4 1 Rice Research Institute of Shenyang Agricultural University, Key Laboratory of Northern Japonica  
5 Rice Genetics and Breeding, Ministry of Education and Liaoning Province, Key Laboratory of  
6 Northeast Rice Biology and Genetics and Breeding, Ministry of Agriculture, Shenyang 110866, China;  
7 xiaoxizhen1991@163.com (X.Z.); lixin241910@163.com (X.L.); yujinlei0628@163.com (J.Y.)

8 \*Correspondence: [celiafanfan@163.com](mailto:celiafanfan@163.com) or [celiafanfan@syau.edu.cn](mailto:celiafanfan@syau.edu.cn) (F.X.)

9

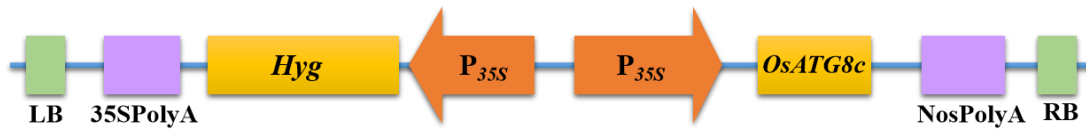

10

11 **Supplementary Figure 1.** Schematic diagram of 35S-*OsATG8c* construction. P<sub>35S</sub>, CaMV 35S  
 12 promoter; *Hyg*, hygromycin; 35SPolyA; CaMV 35S terminator polyA signal; NosPolyA,  
 13 nopaline synthase terminator polyA signal; RB and LB, right and left border of Ti plasmid.

14

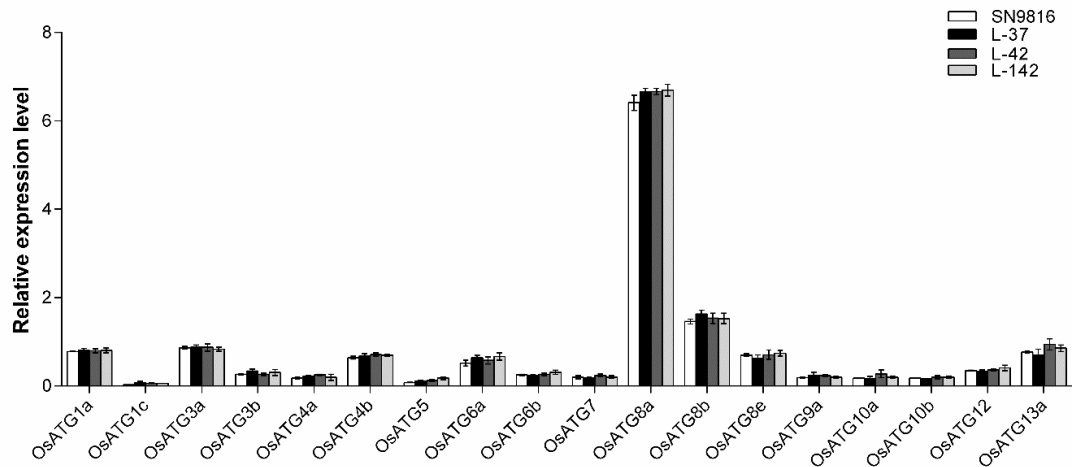

15

16 **Supplementary Figure 2.** Real-time RT-PCR analysis of the transcript levels of *OsATGs* in 21-  
 17 day-old seedlings of SN9816 and 35S-*OsATG8c* transgenic rice under N sufficient condition.

18

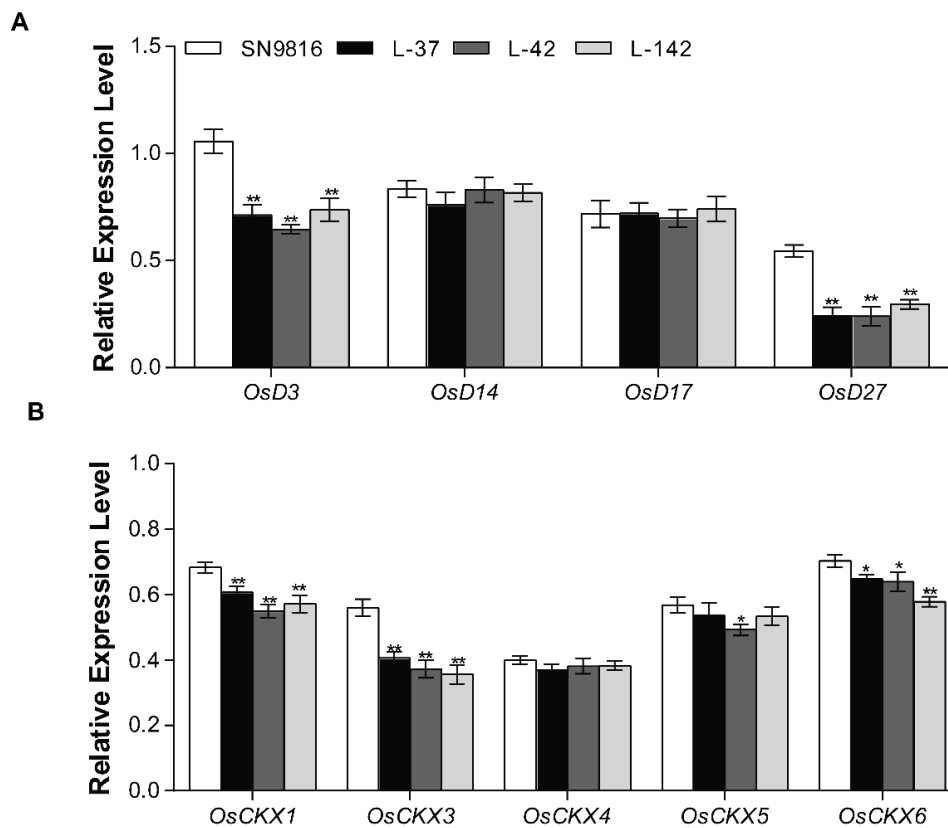

19

20 **Supplementary Figure 3.** Overexpression of *OsATG8c* affected the expression of the tiller  
 21 related genes. Expression level of (A) genes involved strigolactones pathway and (B) cytokinin

22 oxidase/dehydrogenase (CKXs) genes in tiller buds of 32-day-old SN9816 and transgenic rice  
 23 seedlings. Values are means  $\pm$  SD (n = 10), \* $P$  < 0.05, \*\* $P$  < 0.01 (t-test).

24

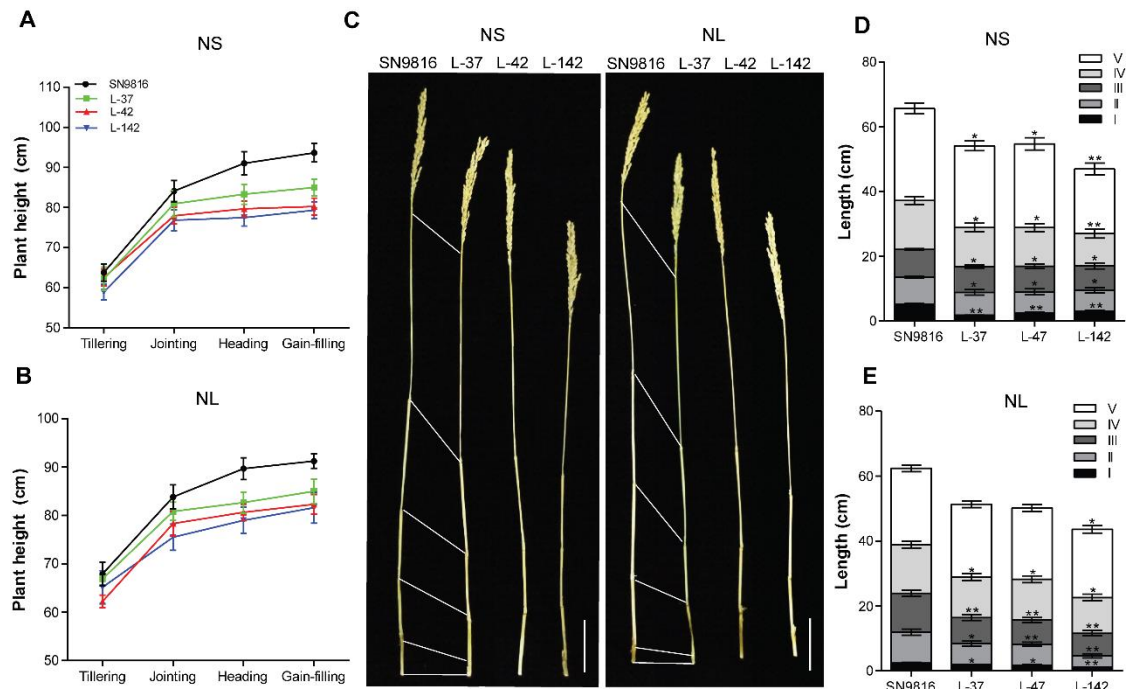

25  
 26 **Supplementary Figure 4.** Overexpression of *OsATG8c* lowered plant height. (A) and (B) The  
 27 plant height curve of SN9816 and transgenic lines under NS (225 kg·ha<sup>-1</sup>) and NL (75 kg·ha<sup>-1</sup>)  
 28 conditions at various growth stage, values are means  $\pm$  SD (n = 12). (C) Comparisons of culm  
 29 length in SN9816 and transgenic lines under NS (225 kg·ha<sup>-1</sup>) and NL (75 kg·ha<sup>-1</sup>) conditions at  
 30 ripening stage. I, II, III, IV and V indicate the first, second, third, fourth and fifth internode,  
 31 respectively. Scale bars, 10 cm. (D) and (E) Quantification of the internode length in panel C,  
 32 values are means  $\pm$  SD (n = 12), asterisks indicate significant differences of each internode length  
 33 between SN9816 and the transgenic lines, \* $P$  < 0.05, \*\* $P$  < 0.01 (t-test).

34

**Supplementary Table 1** The information of primers used in this study.

| Primer name | Sequence (5' → 3')             | Functions        |
|-------------|--------------------------------|------------------|
| cOsATG8c-F  | CCATGGATGGCGAGGAGCTCGTTCAAGC   | Gene cloning     |
| cOsATG8c-R  | GGTGACCTCAGACAAACAGGCCGAAGGTGT | Gene cloning     |
| cpOsATG8c-F | AAGCTTCGTGGCTGTGTATGCCTTGC     | Gene cloning     |
| cpOsATG8c-R | CCATGGCGCCCTGCCTTGCTTTCTT      | Gene cloning     |
| rtOsATG8c-F | GACCTCACGGTTGGACAGTT           | Real-time RT-PCR |
| rtOsATG8c-R | TGGAAGCGTGTCTTGACGA            | Real-time RT-PCR |
| rtOsATG1a-F | CCAAACGAGGGCGTGTAAGA           | Real-time RT-PCR |
| rtOsATG1a-R | CACCGAGCTCACGTTACAGT           | Real-time RT-PCR |
| rtOsATG1c-F | TGCTCCTGCACACGGTTATT           | Real-time RT-PCR |
| rtOsATG1c-R | TCCATAGGGGACATGAGCA            | Real-time RT-PCR |
| rtOsATG3a-F | AGCCAAGATCATGCACGGAA           | Real-time RT-PCR |

|              |                          |                  |
|--------------|--------------------------|------------------|
| rtOsATG3a-R  | ACAGCAGCATGTTTGCATGG     | Real-time RT-PCR |
| rtOsATG3b-F  | CTGCCCCCTCTCTTGCAAAAT    | Real-time RT-PCR |
| rtOsATG3b-R  | CCAAATACAGGCATGCGACC     | Real-time RT-PCR |
| rtOsATG4a-F  | GCCGTGACAAAGGTGAACTG     | Real-time RT-PCR |
| rtOsATG4a-R  | CTCAGAGGCCCGAGAACAGA     | Real-time RT-PCR |
| rtOsATG4b-F  | GCACTGTCTCGATACCCAG      | Real-time RT-PCR |
| rtOsATG4b-R  | CGCTGTAACATGGTAACAGAACG  | Real-time RT-PCR |
| rtOsATG5-F   | CAGCTCGAAGGCATCACGTA     | Real-time RT-PCR |
| rtOsATG5-R   | TGCCTTGCACCCTTACTAGC     | Real-time RT-PCR |
| rtOsATG6a-F  | GTGACAAGGTAGGGAGCCAC     | Real-time RT-PCR |
| rtOsATG6a-R  | GATTGCGCTGCACACAAAGA     | Real-time RT-PCR |
| rtOsATG6b-F  | TGCAGCTCTGGTTAGGTGAG     | Real-time RT-PCR |
| rtOsATG6b-R  | TCTCAAGTATGTGTTGCTGAAGAC | Real-time RT-PCR |
| rtOsATG7-F   | AGCCTGCGTTGGAAGATTGA     | Real-time RT-PCR |
| rtOsATG7-R   | GGAAATGATGCTTCGCCGAC     | Real-time RT-PCR |
| rtOsATG8a-F  | ATAGCATGTCCCTGTGCTGG     | Real-time RT-PCR |
| rtOsATG8a-R  | CGCCCAATCACACTTCAGAC     | Real-time RT-PCR |
| rtOsATG8b-F  | GCTGATCTTACCGTTGGGCA     | Real-time RT-PCR |
| rtOsATG8b-R  | ATCAGAGCAGCTGTTGGTGG     | Real-time RT-PCR |
| rtOsATG8e-F  | CCTCCGTGGAGATCTGCTTT     | Real-time RT-PCR |
| rtOsATG8e-R  | GGTGGGATAATTAAGTTCGGTATG | Real-time RT-PCR |
| rtOsATG9a-F  | ATGGCGATGAAACGTCCGAT     | Real-time RT-PCR |
| rtOsATG9a-R  | CTGTCCTTCTGAGGGGCATC     | Real-time RT-PCR |
| rtOsATG10a-F | GTGAGGGATGGACTCTGTC      | Real-time RT-PCR |
| rtOsATG10a-R | TGGAACTCCCATCTTGCAGC     | Real-time RT-PCR |
| rtOsATG10b-F | TTCCAGGCTCCACTGCTCT      | Real-time RT-PCR |
| rtOsATG10b-R | CAAACACAGGATTTGATGGCTC   | Real-time RT-PCR |
| rtOsATG12-F  | AGTCCAAGTTCAAGATTGGTGA   | Real-time RT-PCR |
| rtOsATG12-R  | GTTGCCCGTCGATTCCAAAG     | Real-time RT-PCR |
| rtOsATG13a-F | GTCAACCGGCGCTTGTTATG     | Real-time RT-PCR |
| rtOsATG13a-R | ATCCGGTTGGTTTTGCTTGC     | Real-time RT-PCR |
| rtOsD3-F     | TCCAAACTTGCCGGACATGCAGTT | Real-time RT-PCR |
| rtOsD3-R     | CCATTGCACAGTGGAGCAATGGCA | Real-time RT-PCR |
| rtOsD10-F    | CTGTACAAGTTCGAGTGGCACC   | Real-time RT-PCR |
| rtOsD10-R    | CCTCGTCCGTCTCCTCGTAC     | Real-time RT-PCR |
| rtOsD14-F    | GTGCTGTGCGATGGCTTC       | Real-time RT-PCR |
| rtOsD14-R    | GCAGGTGCTCGACGTAGG       | Real-time RT-PCR |

|              |                           |                  |
|--------------|---------------------------|------------------|
| rtOsD17-F    | GAGGATGGTGGCTATGTTCT      | Real-time RT-PCR |
| rtOsD17-R    | AGACTGGATCTGATGCTTGCT     | Real-time RT-PCR |
| rtOsD27-F    | TCTGGGCTAAAGAATGAAAAGGA   | Real-time RT-PCR |
| rtOsD27-R    | AGAGCTTGGGTCACAATCTCG     | Real-time RT-PCR |
| rtOsD53-F    | TGGGTTCTGAGTGCATGTTG      | Real-time RT-PCR |
| rtOsD53-R    | GTGTCCTCACAGGCCACTAG      | Real-time RT-PCR |
| rtOsCKX1-F   | TCAACAAATCCAAGTGGGATGCGG  | Real-time RT-PCR |
| rtOsCKX1-R   | TCGCAGAACCTCAGTATCCTCTGT  | Real-time RT-PCR |
| rtOsCKX2-F   | GTCAGTGGAGGGGCGGTA        | Real-time RT-PCR |
| rtOsCKX2-R   | CGTTGGAAATCTGGGGGC        | Real-time RT-PCR |
| rtOsCKX3-F   | ATGAGCAATCCCTTCACAGCTCCT  | Real-time RT-PCR |
| rtOsCKX3-R   | TGACTTCCACGACCTGTCCACAT   | Real-time RT-PCR |
| rtOsCKX4-F   | GACCGACTACCTCCATCTCACA    | Real-time RT-PCR |
| rtOsCKX4-R   | GGTTGACATTGCTGACCTGC      | Real-time RT-PCR |
| rtOsCKX5-F   | AGGGCCTAATCAACAACCTGGAGGT | Real-time RT-PCR |
| rtOsCKX5-R   | GGTGGAGTCGTCGTAATTCTTGGT  | Real-time RT-PCR |
| rtOsCKX6-F   | ACAAGTCCAGCTCAATCGGACACT  | Real-time RT-PCR |
| rtOsCKX6-R   | TCCCGCAAGCCTATCAATGTCGAA  | Real-time RT-PCR |
| rtOsSPL14-F  | GATGGATTGGTCTCTGTAGAGG    | Real-time RT-PCR |
| rtOsSPL14-R  | TTGAACACAAAATAAGGGCAGG    | Real-time RT-PCR |
| rtOsFC1-F    | GCTTGGAGCAGTGTACTATACT    | Real-time RT-PCR |
| rtOsFC1-R    | CTATGTCGATGCACACATTCAG    | Real-time RT-PCR |
| rtOsMOC1-F   | GTACCTGGCGTTCAACCA        | Real-time RT-PCR |
| rtOsMOC1-R   | TCGAGGTCGAGGATGTGGA       | Real-time RT-PCR |
| rtOsSta2-F   | GCTTGGAGCAGTGTACTATACT    | Real-time RT-PCR |
| rtOsSta2-R   | CTATGTCGATGCACACATTCAG    | Real-time RT-PCR |
| rtOsNPF7.2-F | TGCAAGTGCCACTCCTCAAGG     | Real-time RT-PCR |
| rtOsNPF7.2-R | AGGACGGTCTCCAGGTACACCACC  | Real-time RT-PCR |
| rtOsIAGLU-F  | TGCTCTTCAACTCGTTTCGAC     | Real-time RT-PCR |
| rtOsIAGLU-R  | GACAACCCAGCCAAAACATTA     | Real-time RT-PCR |
| rtOsActin1-F | ACCATTGGTGCTGAGCGTTT      | Real-time RT-PCR |
| rtOsActin1-R | CGCAGCTTCCATTCTATGAA      | Real-time RT-PCR |
